# Supplementary material
Source: PubMed Central journal article supplement (PMC3482979)
Supplement: NIHMS408719-supplement-1_si_002.pdf [file NIHMS408719-supplement-1_si_002.pdf]

## Supporting Information for

# <sup>1</sup>H-ENDOR Evidence for a Hydrogen Bonding Interaction That Modulates the Reactivity of a Nonheme Fe<sup>IV</sup>=O Unit

Muralidharan Shanmugam,<sup>#</sup> Genqiang Xue,<sup>‡</sup> Lawrence Que Jr.,<sup>‡\*</sup> Brian M. Hoffman<sup>#\*</sup>

<sup>#</sup>Chemistry Department, Northwestern University, Evanston, Illinois, 60208-3113, <sup>‡</sup>Department of Chemistry  
and Center for Metals in Biocatalysis, University of Minnesota, Minneapolis, Minnesota-55455

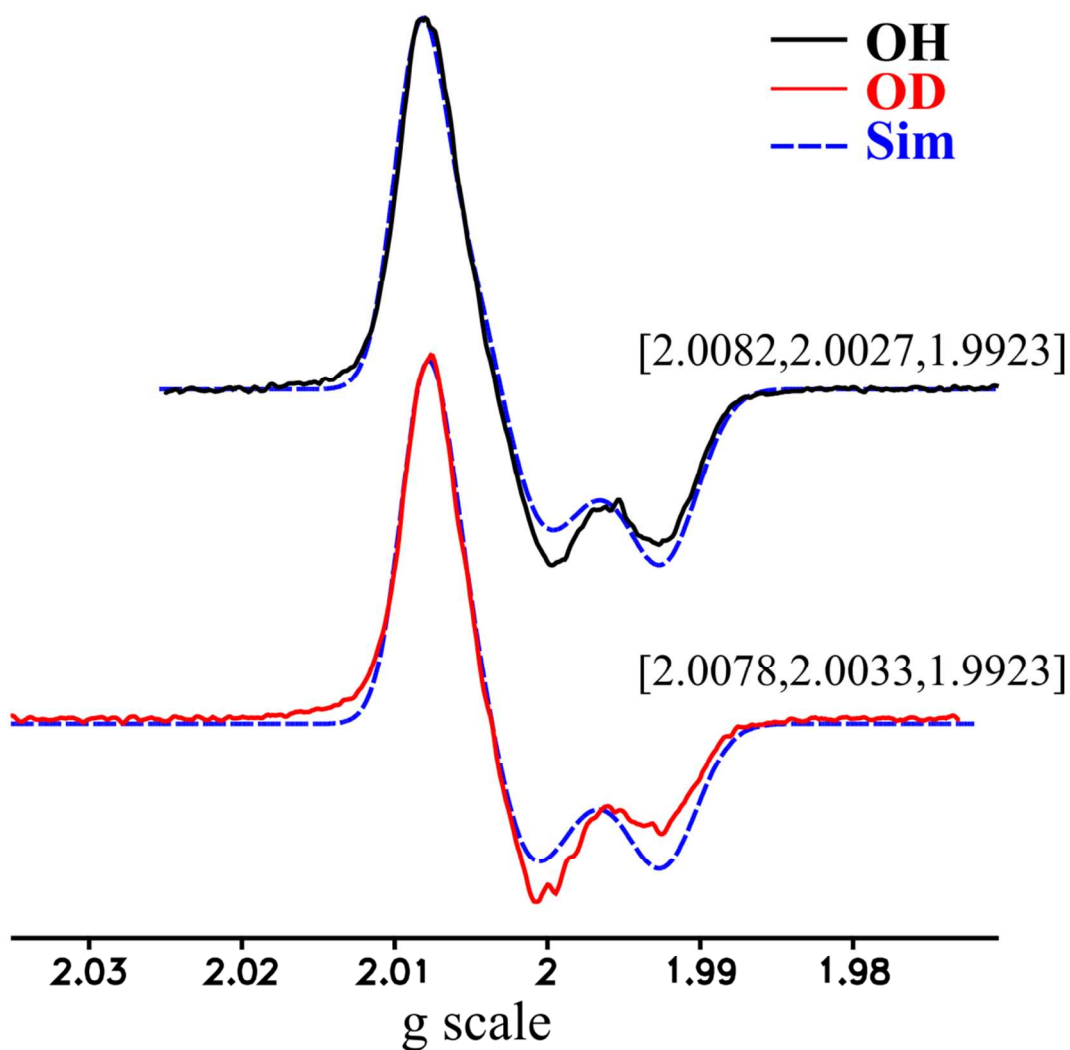

**Fig S1: Solid lines:** Echo-detected 35 GHz EPR spectra of **1** in OH/OD. Derivative spectra generated by numerical derivatives of absorption-display spectra. **Dashed lines:** Simulations performed using WIN-EPR program; g-values for the fits are listed. *Conditions:* Two-pulse echo,  $\pi$ -pulse = 80 ns,  $\tau$  = 600 ns, repetition time = 50 ms, 34.698 GHz (OH), 34.75 GHz (OD), T = 2 K.

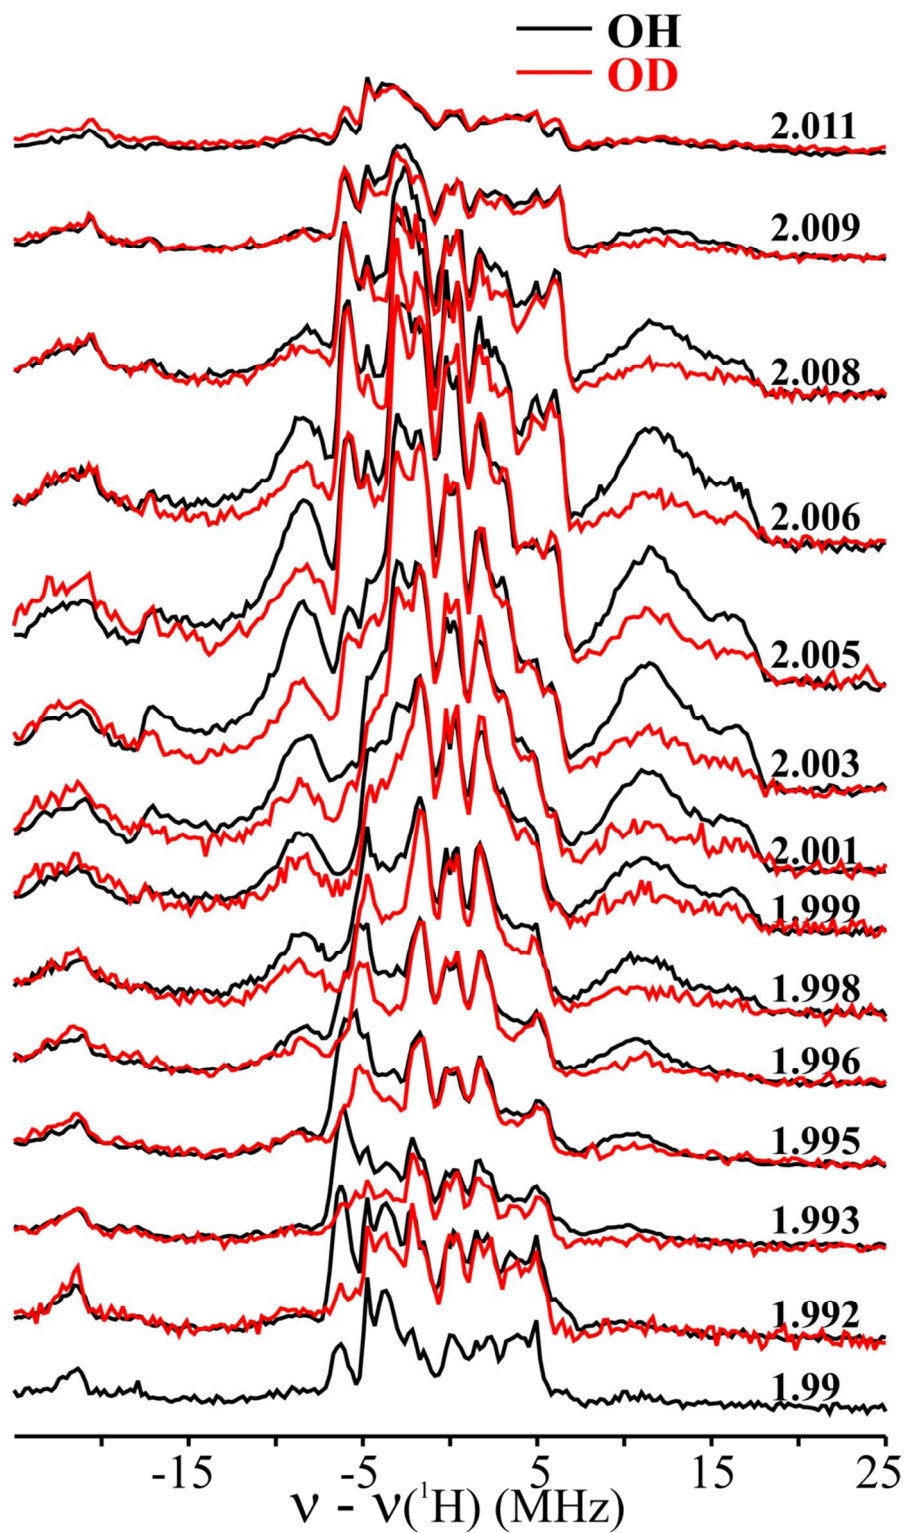

**Fig S2:** Experimental 2-D field-frequency plot of Davies  $^1\text{H}$ -ENDOR spectra of **1** in OH (black) and OD (red). All spectra have been centered at  $^1\text{H}$  nuclear Larmor frequency. *Conditions:*  $\pi$  pulse length = 120 ns,  $\tau$  = 600 ns, repetition time = 40 ms, 34.698 GHz (OH), 34.75 GHz (OD),  $T$  = 2 K.

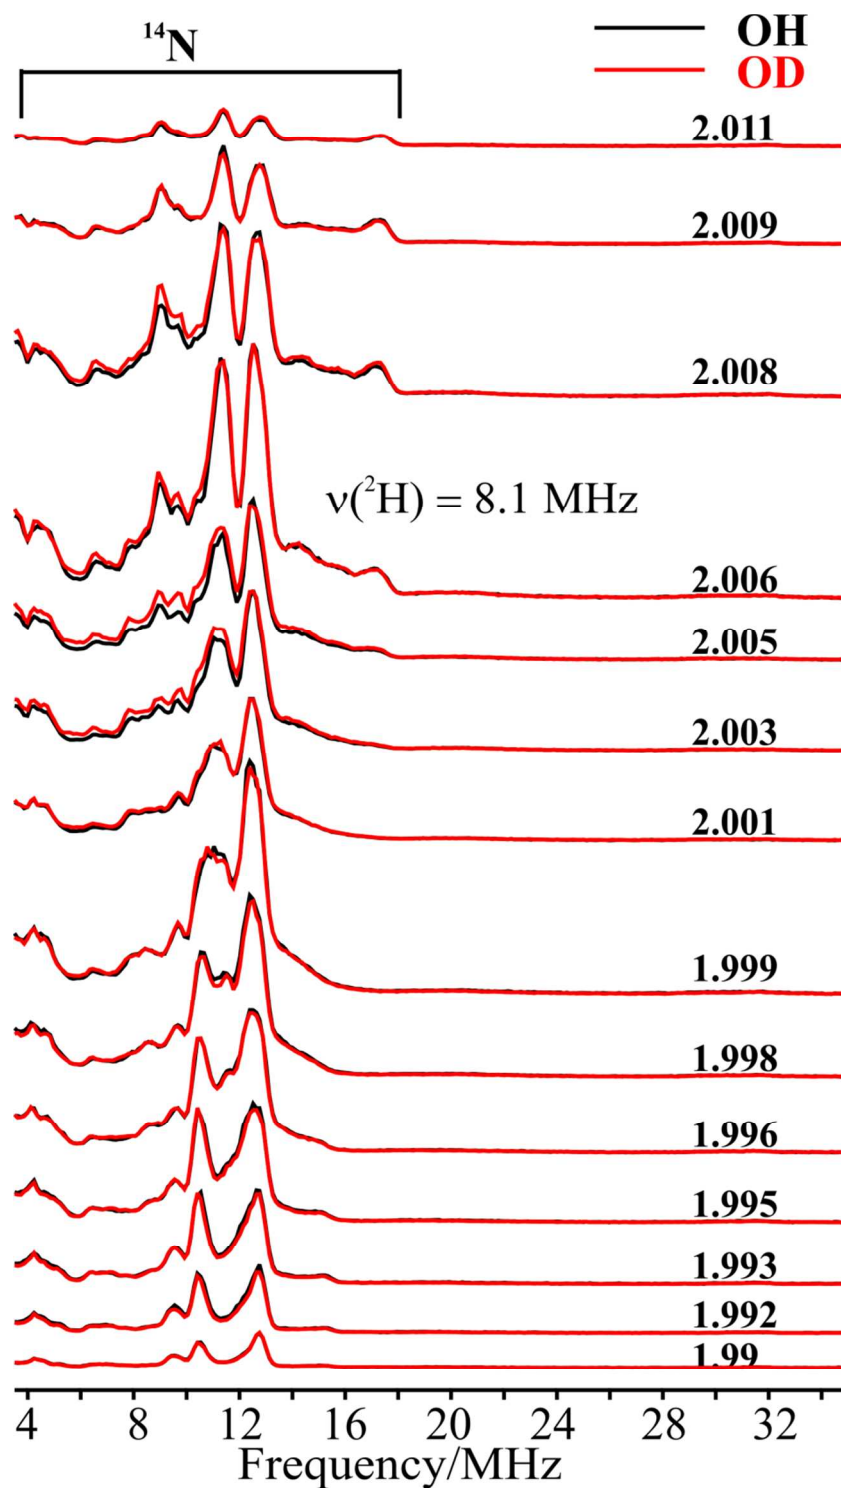

**Fig S3:** Experimental 2-D field-frequency plot of Davies  $^{14}\text{N}$ -ENDOR spectra of **1** in OH (black) and OD (red). *Conditions:*  $\pi$  pulse length = 120 ns,  $\tau$  = 600 ns, repetition time = 40 ms, 34.713 GHz (OH), 34.722 GHz (OD),  $T = 2 \text{ K}$ .

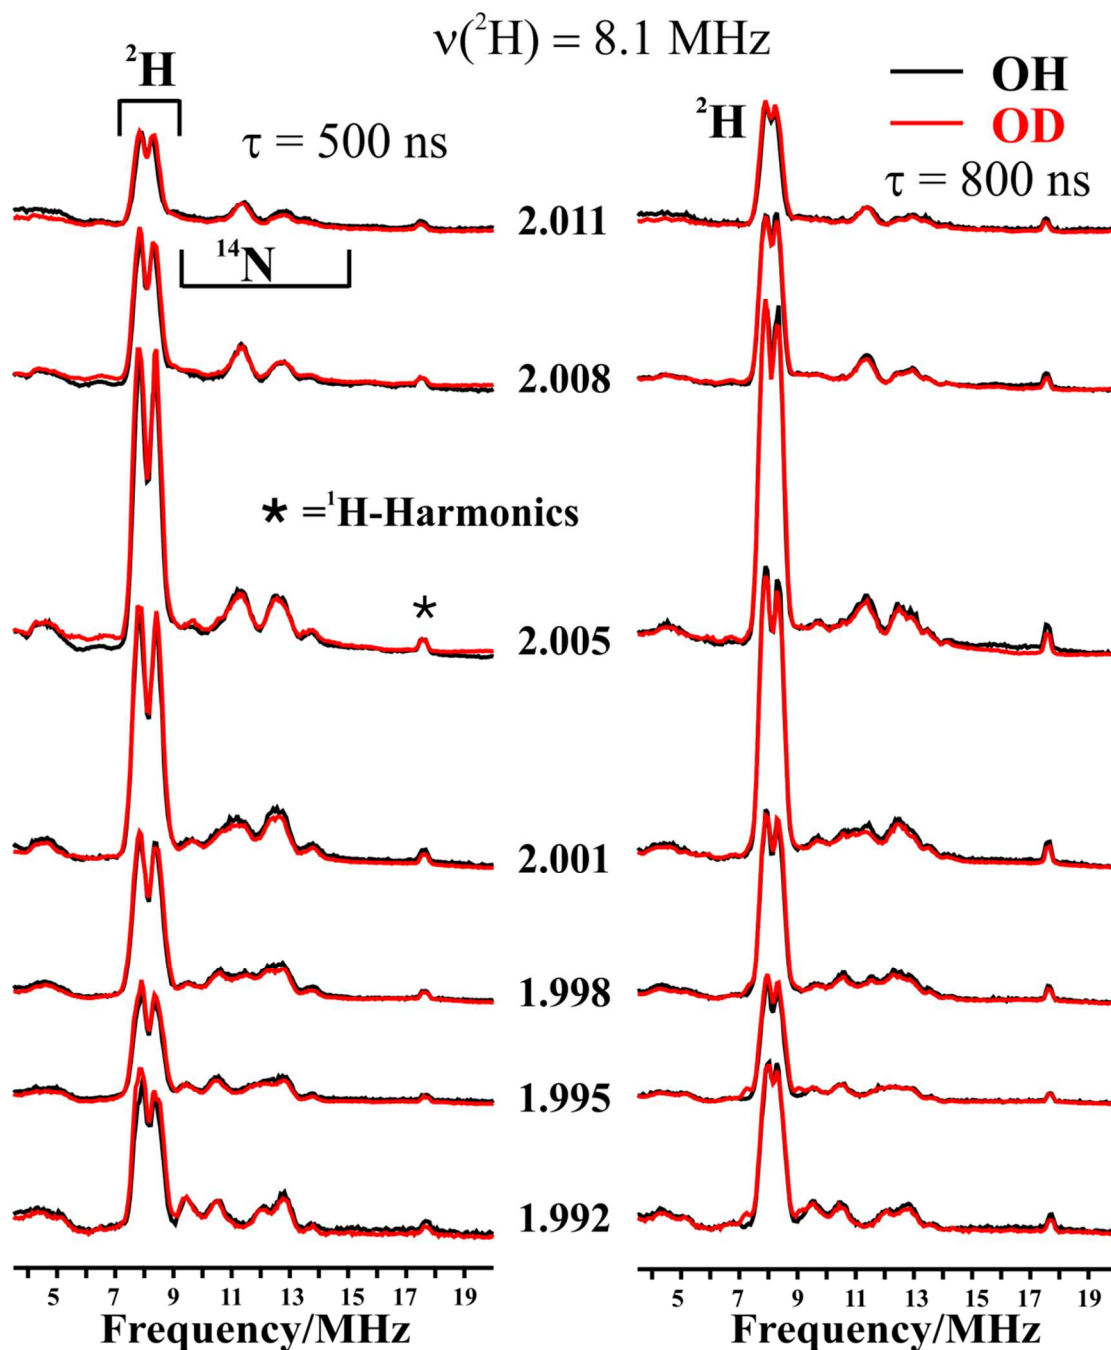

**Fig S4:** Experimental 2-D field-frequency plot of Mims  $^2\text{H}$  and  $^{14}\text{N}$ -ENDOR spectra of **1** in OH (black) and OD (red). The  $^2\text{H}$ -doublet centered at  $\nu_{\text{D}}$  arises from the deuterated methylene arms of **L** (Scheme 1). Conditions:  $\pi/2$  pulse length = 50 ns, repetition time = 40 ms, 34.713 GHz (OH), 34.722 GHz (OD), T = 2 K.

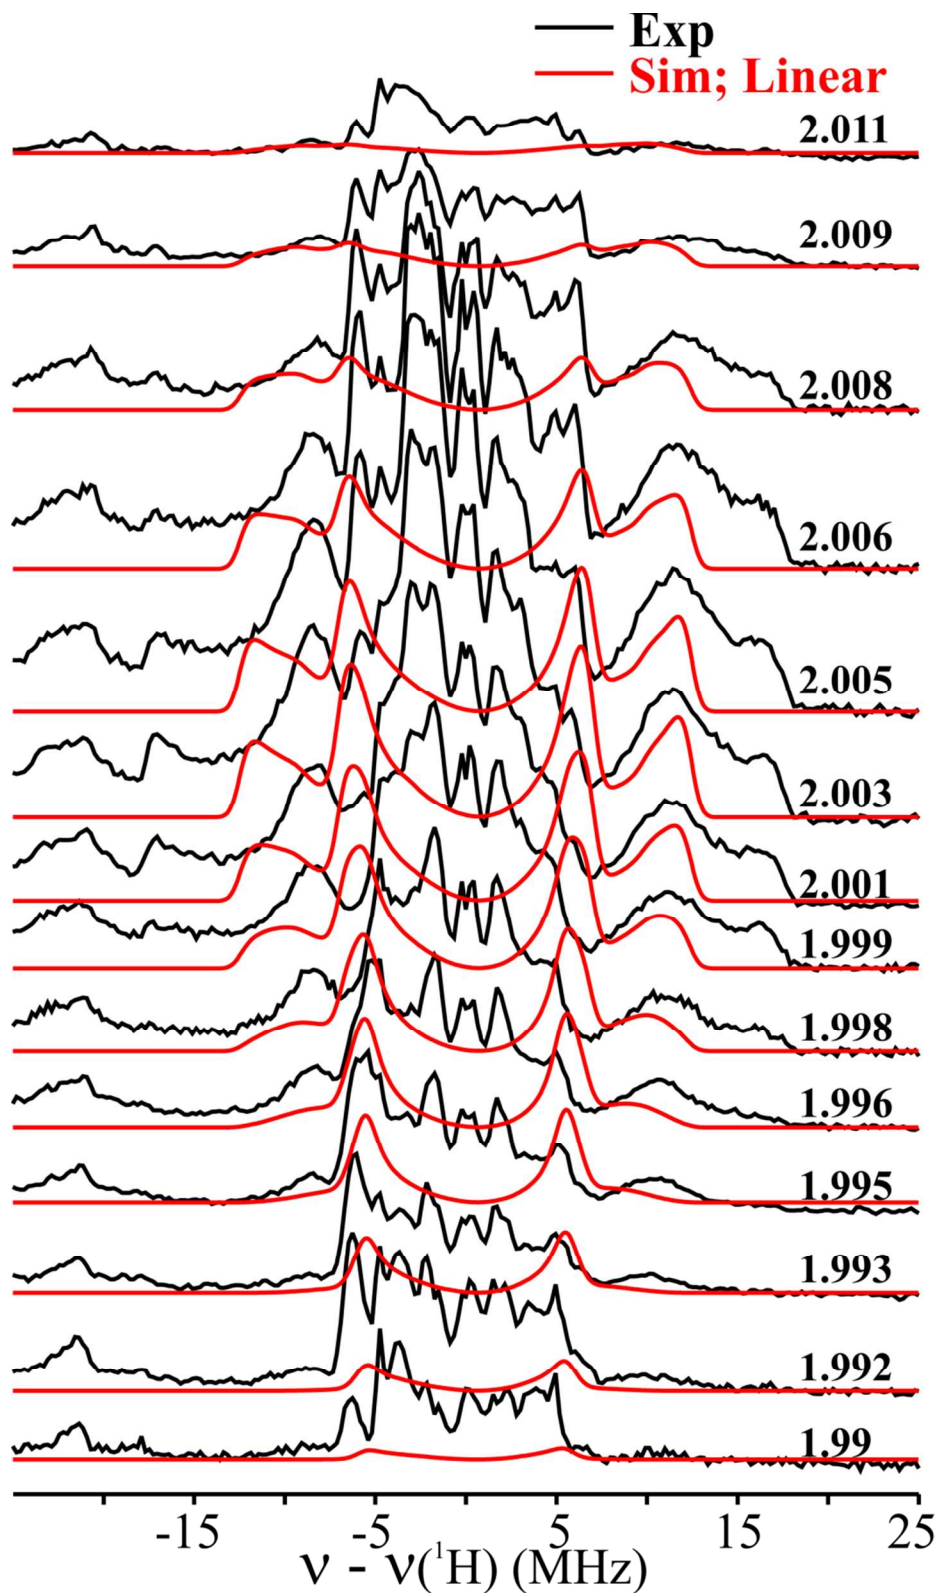

**Fig S5:** Comparisons of experimental 2-D  $^1\text{H}$ -ENDOR pattern of **1(OH)** with simulation performed by assuming a linear  $\text{Fe(III)}-\mu(\text{O})-\text{Fe(IV)}$  geometry. The metrical and Spin-Hamiltonian parameters used to do the simulation are given in table S1.

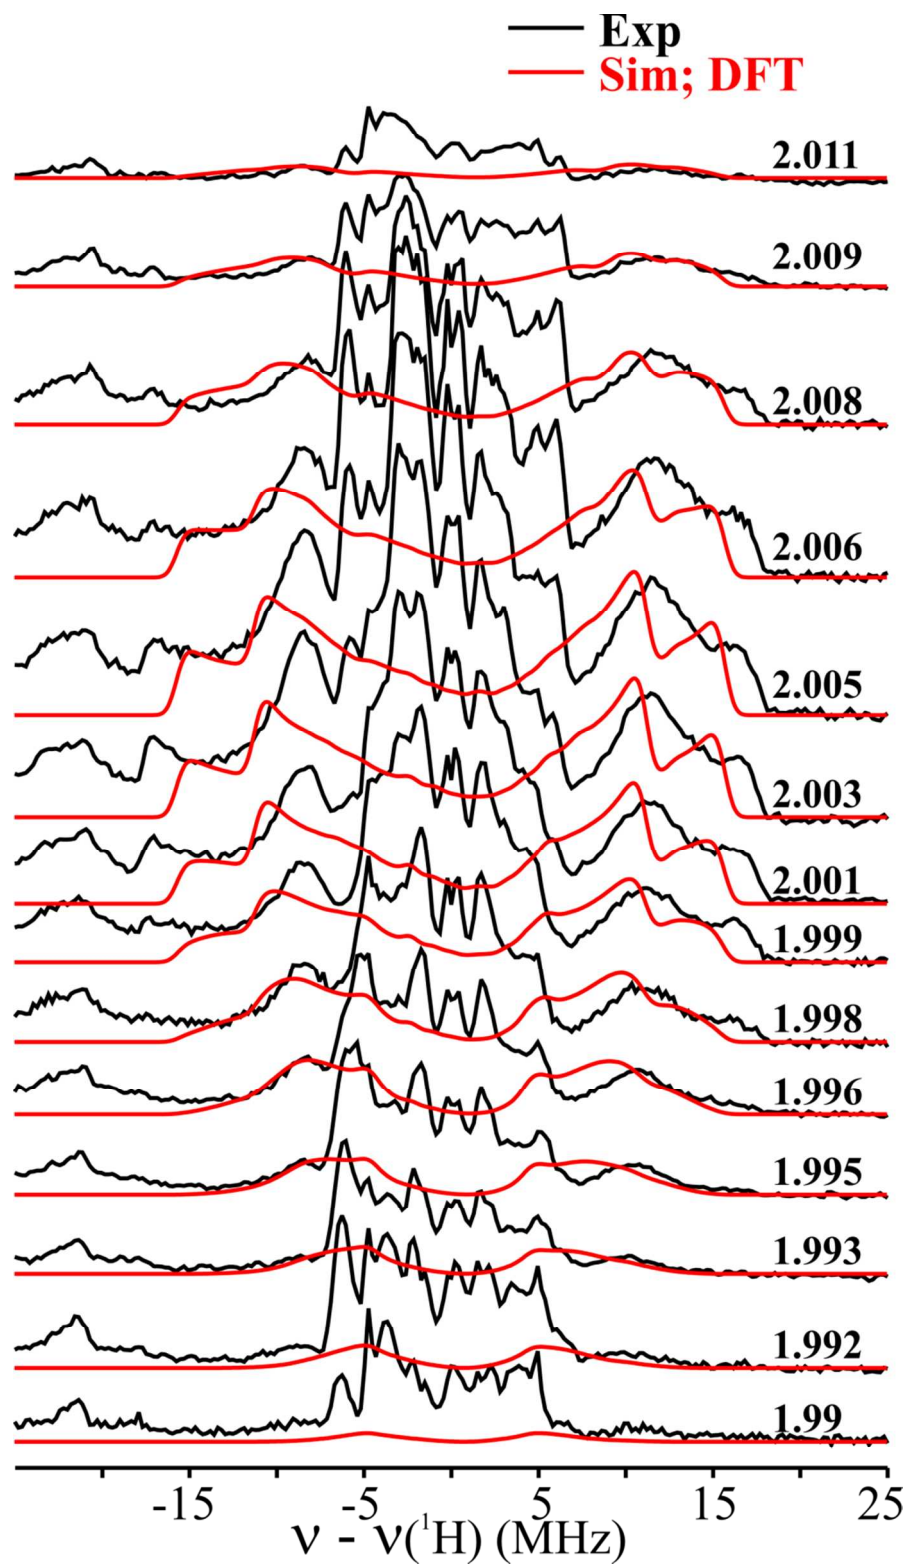

**Fig S6:** Comparisons of experimental 2-D  $^1\text{H}$ -ENDOR pattern of  $\mathbf{1(OH)}$  with simulation performed by assuming DFT optimized location of  $^1\text{H}_A$ , whose metrical and Spin-Hamiltonian parameters are given in table S1.

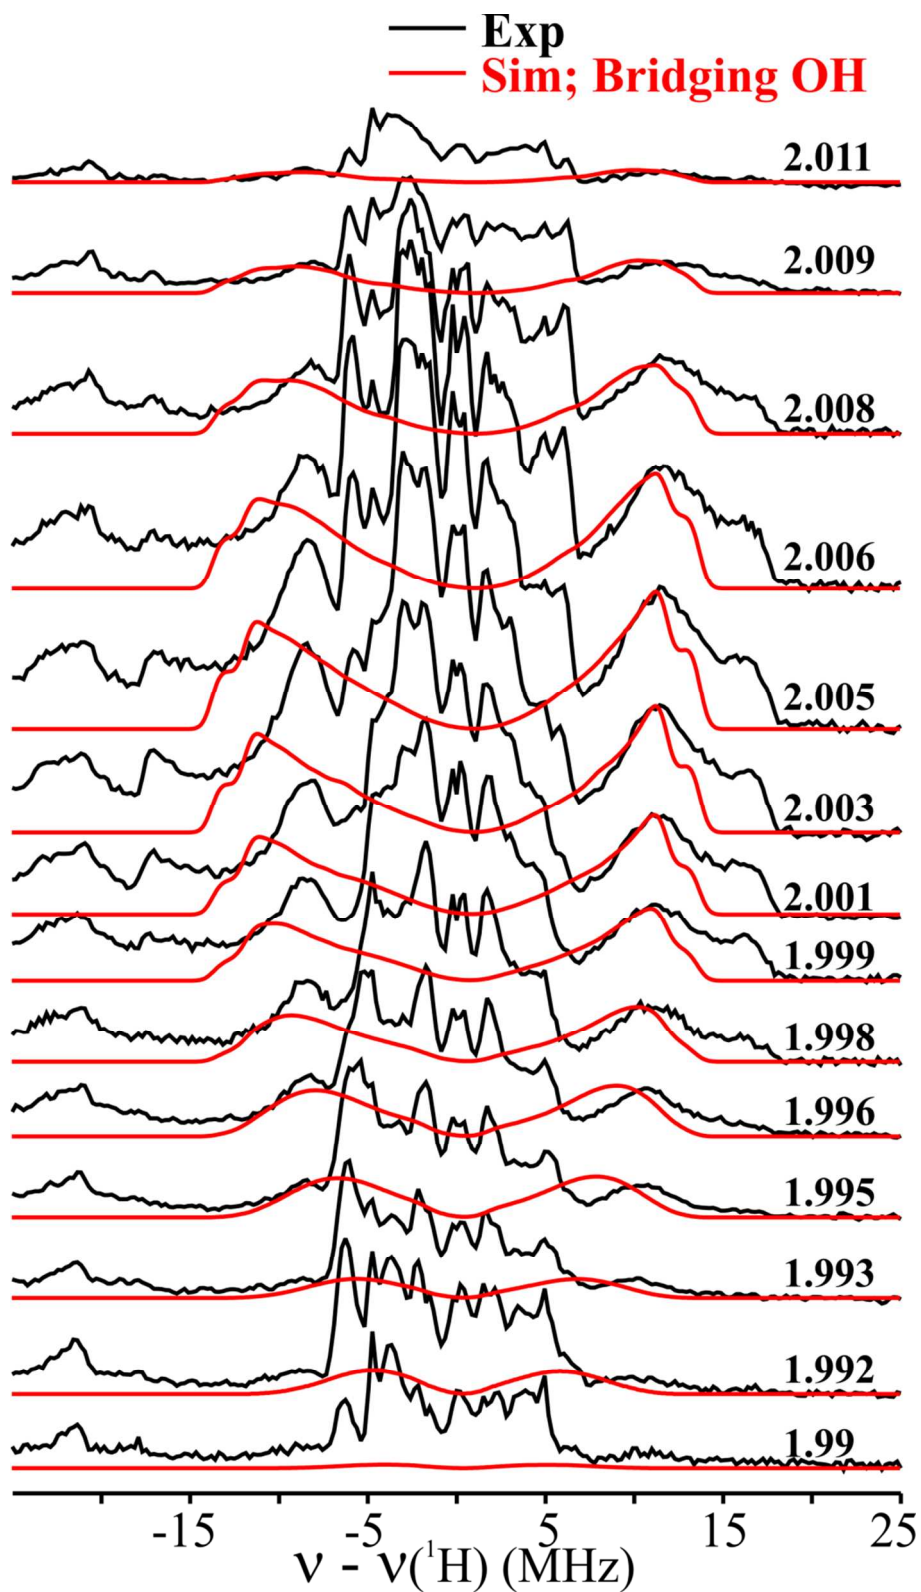

**Fig S7:** Comparisons of experimental 2-D  $^1\text{H}$ -ENDOR pattern of  $1(\text{OH})$  with simulation performed by assuming a bridging  $\mu(\text{OH})$  hydroxide, by adding to proton to a  $\mu(\text{O})$  bridge, whose metrical and Spin-Hamiltonian parameters are given in table S1.

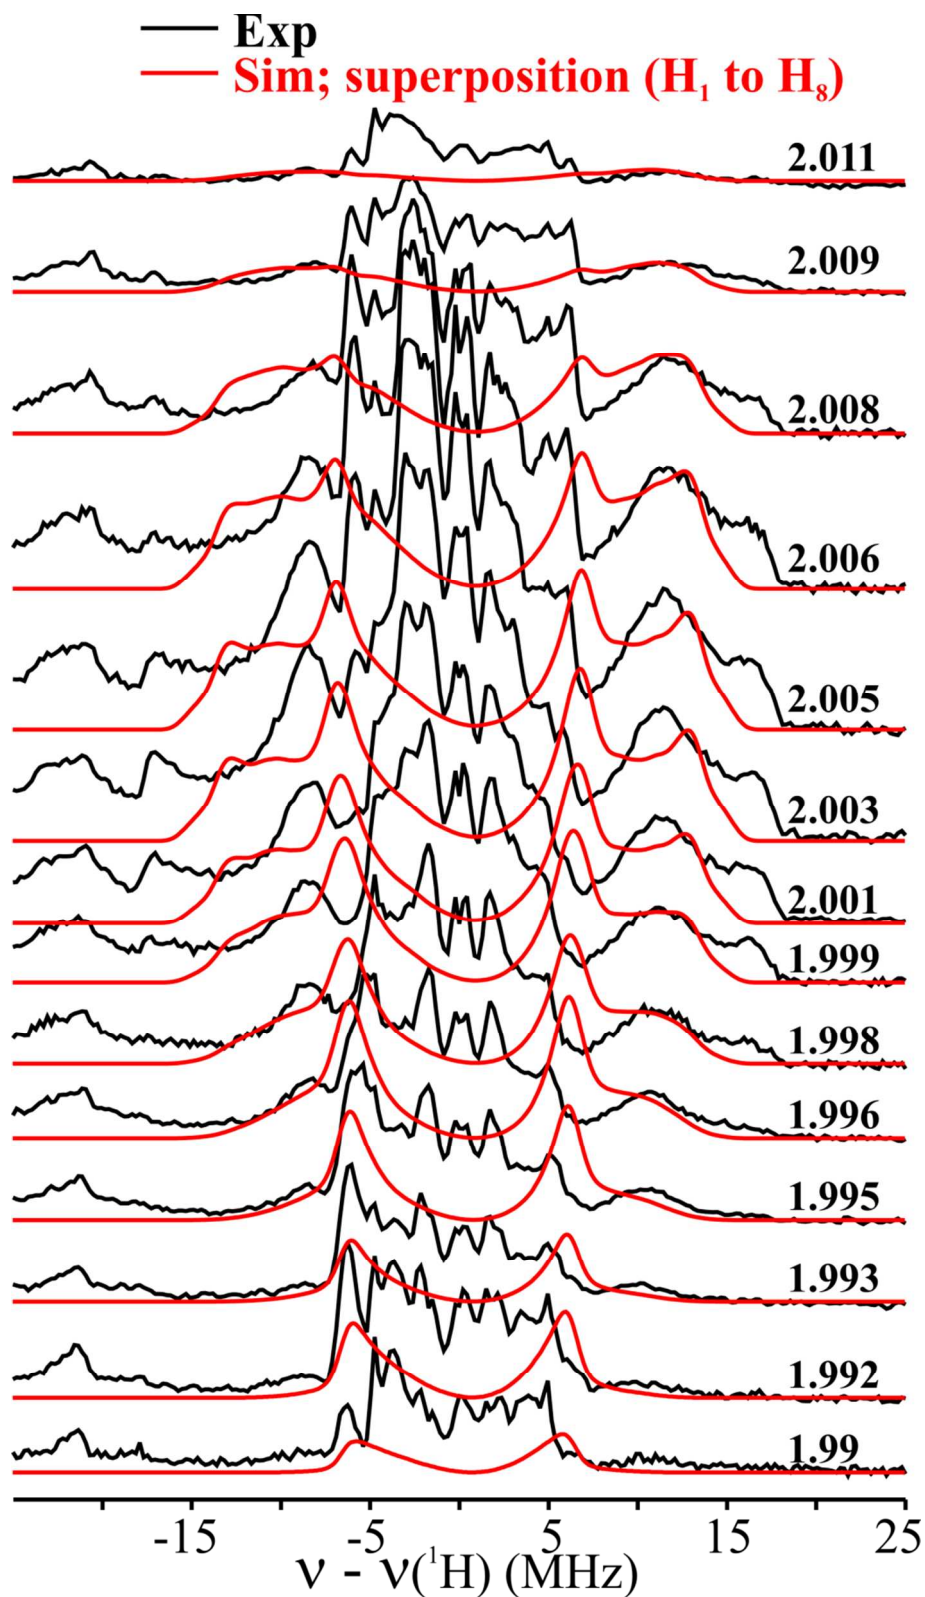

**Fig S8:** Comparisons of experimental 2-D  $^1\text{H}$ -ENDOR pattern of **1(OH)** with simulation performed by assuming  $^1\text{H}_A$  to be randomly rotated around the Fe(III)-O bond, with the superposition 2-D spectra obtained by summing the simulations, corresponding to multiple  $^1\text{H}_A$  orientations whose metrical and dipolar tensors are given in table S2.



**Table S1:** Metrical and  $^1\text{H}$  Spin-Hamiltonian Parameters used to simulate 2-D pattern for  $^1\text{H}_\text{A}$ 

| Metrical Parameters         | Experiment <sup>a</sup> |                         | $^1\text{H}_\text{A}$ Hyperfine tensors  |                                             |                                 |                                         |
|-----------------------------|-------------------------|-------------------------|------------------------------------------|---------------------------------------------|---------------------------------|-----------------------------------------|
|                             | $\mathbf{A}_\text{exp}$ | $\mathbf{T}_\text{exp}$ | $\mathbf{T}$ : Modified DFT <sup>b</sup> | $\mathbf{T}$ : Linear <sup>c</sup> geometry | $\mathbf{T}$ : DFT <sup>d</sup> | $\mathbf{T}$ : Bridging <sup>e</sup> OH |
| $A_1/T_1$ (MHz)             | -25                     | -24.3                   | -24.3                                    | -14.0                                       | -22.4                           | -23.7                                   |
| $A_2/T_2$ (MHz)             | -12                     | -11.3                   | -11.3                                    | -10.9                                       | -9.0                            | -3.7                                    |
| $A_3/T_3$ (MHz)             | 34.8                    | +35.6                   | +35.6                                    | +24.9                                       | +31.4                           | +27.4                                   |
| $a_\text{iso}$ (MHz)        | -                       | 0                       | 0                                        | 0                                           | 0                               | 0                                       |
| $\lambda = (T_2 - T_1)/T_3$ | 0.73                    | 0.365                   | 0.365                                    | 0.126                                       | 0.427                           | 0.73                                    |
| $d_{\text{Fe-Fe}}$ (Å)      |                         |                         |                                          | 3.7                                         | 3.341                           | 3.341                                   |
| $r_1$ (Å)                   |                         |                         | <b>2.198</b>                             | <b>2.387</b>                                | <b>2.387</b>                    | <b>2.52</b>                             |
| $(\beta_1)$ (deg)           |                         |                         | <b>53.8</b>                              | <b>80.6</b>                                 | <b>56.6</b>                     | <b>44.4</b>                             |
| $\gamma$ (deg)              |                         |                         |                                          | 78.4                                        | 53.8                            | 43.1                                    |
| $r_2$ (Å)                   |                         |                         |                                          | 4.1                                         | 2.843                           | 2.341                                   |
| $(\beta_2)$ (deg)           |                         |                         |                                          | 144.5                                       | 135.5                           | 131.1                                   |

<sup>a</sup> Tensor used in simulations of experiment, **Figure 2**, using  $\mathbf{g} = [2.008, 2.003, 1.992]$ .

<sup>b</sup> Tensor calculated using Fe-Fe distance from DFT optimized geometry<sup>1</sup> with slightly repositioned  $^1\text{H}_\text{A}$  exactly matches  $\mathbf{T}$  derived from experiment.

<sup>c</sup> Tensor calculated using metrical parameters of DFT optimized<sup>1</sup> geometry of **1** as modified by linearizing the Fe-O-Fe fragment. Simulations with this tensor, **Figure S5** do not match.

<sup>d</sup> Tensor calculated using metrical parameters of DFT optimized<sup>1</sup> geometry of **1**; simulations with this tensor, **Figure S6** do not match.

<sup>e</sup> Tensor calculated using metrical parameters of DFT optimized<sup>1</sup> geometry of **1** as modified by adding a proton to a  $\mu(\text{O})$ -bridge. Simulations with this tensor, **Figure S7**, do not match.

**Table S2:** Metrical and  $^1\text{H}$  Spin-Hamiltonian Parameters used to simulate the superposition 2-D  $^1\text{H}$ -ENDOR pattern displayed in Figure S8.

| Metrical Parameters         | DFT Optimized geometry for X-Model |                          |                          |                          |                          |                           |                           |                           |
|-----------------------------|------------------------------------|--------------------------|--------------------------|--------------------------|--------------------------|---------------------------|---------------------------|---------------------------|
|                             | H <sub>1</sub><br>(DFT)            | H <sub>2</sub><br>(+45°) | H <sub>3</sub><br>(-44°) | H <sub>4</sub><br>(+89°) | H <sub>5</sub><br>(-87°) | H <sub>6</sub><br>(+124°) | H <sub>7</sub><br>(-121°) | H <sub>8</sub><br>(+141°) |
| $A_1/T_1$ (MHz)             | -22.4                              | -18.6                    | -20.5                    | -15.5                    | -16.6                    | -14.5                     | -14.9                     | -14.3                     |
| $A_2/T_2$ (MHz)             | -9.0                               | -10.6                    | -9.8                     | -11.9                    | -11.4                    | -12.3                     | -12.2                     | -12.4                     |
| $A_3/T_3$ (MHz)             | +31.4                              | +29.2                    | +30.3                    | +27.4                    | +28.0                    | +26.8                     | +27.1                     | +26.7                     |
| $a_{\text{iso}}$ (MHz)      | 0                                  | 0                        | 0                        | 0                        | 0                        | 0                         | 0                         | 0                         |
| $\lambda = (T_2 - T_1)/T_3$ | 0.427                              | 0.274                    | 0.353                    | 0.131                    | 0.186                    | 0.082                     | 0.10                      | 0.071                     |
| $d_{\text{Fe-Fe}}$ (Å)      | 3.341                              |                          |                          |                          |                          |                           |                           |                           |
| $r_1$ (Å)                   | 2.387                              |                          |                          |                          |                          |                           |                           |                           |
| $(\beta_1)$ (deg)           | <b>56.6</b>                        | <b>68.0</b>              | <b>61.3</b>              | <b>86.5</b>              | <b>77.7</b>              | <b>99.4</b>               | <b>93.1</b>               | <b>102.3</b>              |
| $\gamma$ (deg)              | 53.8                               | 64.6                     | 58.1                     | 83.4                     | 74.4                     | 83.1                      | 89.7                      | 80.1                      |
| $r_2$ (Å)                   | 2.843                              | 3.3                      | 3.0                      | 4.0                      | 3.7                      | 4.4                       | 4.2                       | 4.5                       |
| $(\beta_2)$ (deg)           | 135.5                              | 137.9                    | 136.3                    | 143.3                    | 140.5                    | 147.7                     | 145.5                     | 148.8                     |

**References:**

- (1) De Hont, R. F.; Xue, G.; Hendrich, M. P.; Que, L.; Bominaar, E. L.; Munck, E. *Inorg. Chem.* **2010**, *49*, 8310-8322.
